# Supplementary material for: In-Depth Genomic and Phenotypic Characterization of the Antarctic Psychrotolerant Strain Pseudomonas sp. MPC6 Reveals Unique Metabolic Features, Plasticity, and Biotechnological Potential
Source: Front Microbiol. 2019 May 24;10:1154. doi: 10.3389/fmicb.2019.01154 (PMC6543543; doi:10.3389/fmicb.2019.01154)
Supplement: Supplementary file 2 [file Table_2.XLSX]

## Sheet: Hoja1
Supplementary Table 2. List of Pseudomonas strains included in the phylogenetic analysis. Strains shaded in green correspond to those that clustered close to Pseudomonas sp. MPC6
Strain	Year of isolation	Location	Source	Features	Reference
P. aeruginosa LESB58	1988	Liverpool, UK	Isolated from a cystic fibrosis patient	Human pathogen, Denitrification, Plant pathogen	Craig Winstanley, Morgan G.I. Langille, Joanne L. Fothergill, Irena Kukavica-Ibrulj, Catherine Paradis-Bleau, François Sanschagrin, Nicholas R. Thomson, Geoff L. Winsor, Michael A. Quail, Nicola Lennard, Alexandra Bignell, Louise Clarke, Kathy Seeger, David Saunders, David Harris, Julian Parkhill, Robert E.W. Hancock, Fiona S.L. Brinkman and Roger C. Levesque (2015). Newly introduced genomic prop…
P. aeruginosa PA7	2007	Argentina	Non-respiratory clinical isolate	Multidrug-resistant	Roy, P. H., Tetu, S. G., Larouche, A., Elbourne, L., Tremblay, S., Ren, Q., Dodson, R., Harkins, D., Shay, R., Watkins, K., Mahamoud, Y., … Paulsen, I. T. (2010). Complete genome sequence of the multiresistant taxonomic outlier Pseudomonas aeruginosa PA7. PloS one, 5(1), e8842. doi:10.1371/journal.pone.0008842
P. aeruginosa PAO1	1954	Melbourne, Australia	Isolated from a wound	Highly virulent strain. Derived from PAO by spontaneous mutation conferring chloramphenicol resistance	Jens Klockgether, Antje Munder, Jens Neugebauer, Colin F. Davenport, Frauke Stanke, Karen D. Larbig, Stephan Heeb, Ulrike Schöck, Thomas M. Pohl, Lutz Wiehlmann, Burkhard Tümmler (2010) Genome Diversity of Pseudomonas aeruginosa PAO1 Laboratory Strains. Journal of Bacteriology, 192 (4) 1113-1121; DOI: 10.1128/JB.01515-09
P. aeruginosa UCBPP-PA14	before 1995	Boston	Wound isolate	Highly virulent clinical isolate	Daniel G Lee, Jonathan M Urbach, Gang Wu, Nicole T Liberati, Rhonda L Feinbaum, Sachiko Miyata, Lenard T Diggins, Jianxin He, Maude Saucier, Eric Déziel, Lisa Friedman, Li Li, George Grills, Kate Montgomery, Raju Kucherlapati, Laurence G Rahme and Frederick M Ausubel (2006). Genomic analysis reveals that Pseudomonas aeruginosa virulence is combinatorial. Genome Biology 7:R90 Rahme LG, Stevens EJ,…
P. antarctica PAMC 27494	2014	King George Island, Antarctica	Freshwater sample	A bacteriocin-producing psychrophile isolated from Antarctica	Ok-Sun Kim (2016) BioSample, Pseudomonas antarctica PAMC 27494 isolated from Antarctica. National Center for Biotechnology Information. Retrieved from https://www.ncbi.nlm.nih.gov/biosample/?term=PAMC%2027494 Jaejin Leea, Yong-Joon Cho, Jae Young Yang, You-Jung Jung, Soon GyuHong, Ok-SunKim (2017). Complete genome sequence of Pseudomonas antarctica PAMC 27494, a bacteriocin-producing psychrophile…
P. arsenicoxydans CECT7543	2010	Camarones Valley in the Atacama Desert, Chile	Sediment samples	Grow on high arsenic concentration	Campos VL, Valenzuela C, Yarza P, Kämpfer P, Vidal R, Zaror C, Mondaca MA, Lopez-Lopez A, Rosselló-Móra R. (2010) Pseudomonas arsenicoxydans sp nov., an arsenite-oxidizing strain isolated from the Atacama desert. Syst Appl Microbiol. 33(4):193-7. doi: 10.1016/j.syapm.2010.02.007.
P. brassicacearum DF41	1998	Canada: Manitoba	Canola root tip	suppress the fungal pathogen Sclerotinia sclerotiorum	Savchuk, S. and Dilantha Fernando, W. (2004), Effect of timing of application and population dynamics on the degree of biological control of Sclerotinia sclerotiorum by bacterial antagonists. FEMS Microbiology Ecology, 49: 379-388. doi:10.1016/j.femsec.2004.04.014
P. brassicacearum L13-6-12	1997	Germany: Gross Luesewitz, Federal Centre for Breeding Research on Cultivated Plants	rhizosphere of a field grown potato plant	Disease-suppressing effects against Rhizoctonia solani	Lottmann J, Heuer H, Smalla K, Berg G. Influence of transgenic T4-lysozyme-producing plants on beneficial plant-associated bacteria. FEMS Microbiol Ecol. 1999;29:365–77. doi: 10.1111/j.1574-6941.1999.tb00627.x.
P. brassicacearum LBUM300	2004	Canada: New Brunswick: Bouctouche	Field soil	Disease-Suppressive Bacterium with Antagonistic Activity toward Fungal, Oomycete, and Bacterial Plant Pathogens	Mélanie M. Paulin, Amy Novinscak, Marc St-Arnaud, Claudia Goyer, Nadine J. DeCoste, Jean-Pierre Privé, Josée Owen, Martin Filion; Transcriptional activity of antifungal metabolite-encoding genes phlD and hcnBC in Pseudomonas spp. using qRT-PCR, FEMS Microbiology Ecology, Volume 68, Issue 2, 1 May 2009, Pages 212–222, https://doi.org/10.1111/j.1574-6941.2009.00669.x
P. brassicacearum NFM421	2000	France	Rhizoplane of Arabidopsis thaliana	Novel species	Achouak W., et al. 2000. Description of Pseudomonas brassicacearum sp. nov. and Pseudomonas thivervalensis sp. nov., two root-associated bacteria isolated from Arabidopsis thaliana and Brassica napus. Int. J. Syst. Evol. Microbiol. 50:9–18
P. deceptionensis G8684	2011	Antarctica: South Shetland Islands, Deception Island	Marine sediment		Carrion et al. (2011) BioSample; Microbe sample from Pseudomonas deceptionensis. National Center for Biotechnology Information. Retrieved from https://www.ncbi.nlm.nih.gov/biosample/SAMN03328792/
P. entomophila L48	2001	Calvaire (Guadeloupe), France	Drosophila melanogaster	Pathogenic strain	Vodovar N., Vallenet D., Cruveiller S., Rouy Z., Barbe V., Acosta C., Cattolico L., Jubin C., Lajus A., Segurens B., Vacherie B., Wincker P., Weissenbach J., Lemaitre B., Medigue C., Boccard F. (2006). Complete genome sequence of the entomopathogenic and metabolically versatile soil bacterium Pseudomonas entomophila. Nat. Biotechnol. 673-679
P. fluorescens A506	before 1994	USA: California	Pear tree leaf	Blight Biological Control Agent	Wilson M , Lindow SE (1994) Ecological Similarity and Coexistence of Epiphytic Ice-Nucleating (Ice) Pseudomonas syringae Strains and a Non-Ice-Nucleating (Ice) Biological Control Agent. Applied and Environmental Microbiology, 60(9):3128-3137 Improvements to PATRIC, the all-bacterial Bioinformatics Database and Analysis Resource Center. Wattam AR, Davis JJ, Assaf R, Boisvert S, Brettin T, Bun C, C…
P. fluorescens F113	1991	Ireland	Sugar-beet rhizosphere	Plant growth-promoting rhizobacterium	Shanahan, P., O'sullivan, D. J., Simpson, P., Glennon, J. D., & O'gara, F. (1992). Isolation of 2,4-diacetylphloroglucinol from a fluorescent pseudomonad and investigation of physiological parameters influencing its production. Applied and environmental microbiology, 58(1), 353-8.
P. fluorescens Pf-5	1978	USA	Cotton rhizosphere	Biological control agent, suppress seedling diseases of cotton caused by Rhizoctonia solani and Pythium ultimum.	Howell, C. R., and Stipanovic, R. D. 1979. Control of Rhizoctonia solani in cotton seedlings with Pseudomonas fluorescens and with an antibiotic produced by the bacterium. Phytopathology 69:480-482. Joyce E. Loper, Donald Y. Kobayashi, and Ian T. Paulsen (2007). The Genomic Sequence of Pseudomonas fluorescens Pf-5: Insights Into Biological Control Phytopathology. 2007 Feb;97(2):233-8. doi: 10.109…
P. fluorescens SBW25	1989	University Farm, Wytham, Oxford	phyllosphere of sugar beet plant	Protecting the seeds and roots from fungal infection	Rainey, P. B., and M. J. Bailey. (1996). Physical and genetic map of the Pseudomonas fluorescens SBW25 chromosome. Mol. Microbiol. 19:521-533.
P. frederiksbergensis AS1	2005	Gwangju, Kyunggi-Do, South Korea	Arsenic-contaminated site	Grow on naphthalene, salicylate, and catechol	Kang, Y. S., Kim, Y. J., Jeon, C. O., & Park, W. (2006). Characterization of napthalene-degrading Pseudomonas species isolated from pollutant-contaminated sites: Oxidative stress during their growth on napthalene. Journal of Microbiology and Biotechnology, 16(11), 1819-1825. Jisun Kim (2016). BioSample, Genome sequences of Pseudomonas sp. AS1. National Center for Biotechnology Information. Retrie…
P. frederiksbergensis KNU-15	2016	South Korea	Soil	Relevance in Agriculture	Min-Chul Kim (2017). BioSample, MIGS Cultured Bacterial/Archaeal sample from Pseudomonas frederiksbergensis. National Center for Biotechnology Information. Retrieved from https://www.ncbi.nlm.nih.gov/biosample/SAMN07632931/
P. mandelii JR-1	2008	Gyeongsan, South Korea	Natural mineral waters	Secreted extracellular lipolytic enzymes	Hong S, Lee C, Jang SH. (2012). Purification and properties of an extracellular esterase from a cold-adapted Pseudomonas mandelii. Biotechnol.Lett. doi:10.1007/s10529-012-0866-y Pallavi Subhraveti, Quang Ong, Ingrid Keseler, Anamika Kothari, Ron Caspi, Peter D (2018). Karp Summary of Pseudomonas mandelii, Strain JR-1, version 22.5. BioCyc Database Collection. Retrieved from https://biocyc.org/GCF…
P. mandelii LMG21607	1995	France	Mineral water	Denitrification, grow at 4 degrees, alpha-L-glutamyl-L-histidine arylarmidase activity, growth on benzoate and meso-tartrate.	Verhille S, Baida N, Dabboussi F, Izard D, Leclerc H (1999) Taxonomic study of bacteria isolated from natural mineral waters: proposal of Pseudomonas jessenii sp. nov. and Pseudomonas mandelii sp. nov.Syst Appl Microbiol 22:45–58 Global Catalogue of Microorganisms (2018) Retrieved from http://gcm.wfcc.info/Strain_numberToInfoServlet?strain_number=LMG%2021607
P. mendocina NK-01	2011	Tianjin, China.	Farmland soil	Can synthesize medium-chain-length polyhydroxyalkanoate (PHAMCL) and alginate oligosaccharides (AO) simultaneously from glucose under conditions of limited nitrogen.	Wenbin Guo, Cunjiang Song, Meimei KongWeitao, GengYuanyuan, WangShufang Wang (2011). Simultaneous production and characterization of medium-chain-length polyhydroxyalkanoates and alginate oligosaccharides by Pseudomonas mendocinaNK-01. Applied Microbiology and Biotechnology, Volume 92, Issue 4, pp 791–801.
P. pelagia CL-AP6	1981/2009	Antarctica	Isolated from a 30 years Culture of Antarctic Green Alga Pyramimonas gelidicola (1981)	Psychrotolerant Bacterium	Hwang CY1, Zhang GI, Kang SH, Kim HJ, Cho BC. (2009). Pseudomonas pelagia sp. nov., isolated from a culture of the Antarctic green alga Pyramimonas gelidicola. Int J Syst Evol Microbiol. Dec;59(Pt 12):3019-24. doi: 10.1099/ijs.0.008102-0.
P. prosekii AN/28/1	2008	James Ross Island, Antarctica	Soil	Psychrotropic	Marcel Kosina, Milosˇ Barta´k, Ivana Masˇlanˇova´, Andrea Va´vrova´ Pascutti, Ondrej Sˇedo, Matej Lexa, Ivo Sedla´cˇek (2013) Pseudomonas prosekii sp. nov., a Novel Psychrotrophic Bacterium from Antarctica. Curr Microbiol 67:637–646. DOI 10.1007/s00284-013-0406-6
P. putida BIRD-1	2010	Spain?	Soil	Plant growth-promoting rhizobacterium	Matilla, M.A., Pizarro, P., Roca, A., Fernández, M., Duque, E., Molina, L., et al. (2011) Complete genome of the plantgrowth promoting rhizobacterium Pseudomonas putida BIRD-1. J Bacteriol 193: 1290.
P. putida F1	1968	Urbana, IL, EEUU	Polluted creek	Capable of growth on several aromatic hydrocarbons, including benzene, toluene, ethylbenzene and p -cymene.	Gibson, D. T., J. R. Koch, and R. E. Kallio. 1968. Oxidative degradation of aromatic hydrocarbons by microorganisms I. Enzymatic formation of catechol from benzene. Biochemistry 7: 2653-2661. JGI Genome Portal. (2018) Retrieved from https://genome.jgi.doe.gov/portal/psepu/psepu.home.html
P. putida GB-1	before 1992	Green Bay, EEUU	Fresh water	Oxidize soluble manganese(II) to the insoluble manganese(IV) which is deposited outside the cell.	Corstjens, P. L. A. M., J. P. M. de Vrind, P. Westbroek and E. W. de Vrind-de Jong. (1992). Enzymatic iron oxidation by Leptothrix discophora: identification of an iron-oxidizing protein. Appl. Environ. Microbiol. 58:450–454
P. putida KT2440 (mt-2)	1960	Japan	Soil	Versatile saprophytic soil bacterium that has been certified as a biosafety host for the cloning of foreign genes. Derived from P.putida mt-2, by loss of its plasmid	Nakazawa, T. (2002). Travels of a Pseudomonas, from Japan around the world. Environmental Microbiology, 4(12), 782–786. doi:10.1046/j.1462-2920.2002.00310.x
P. putida S16	2006	Shandong, China.	Soil samples obtained from a field under continuous tobacco cropping	Nicotine-degrading	Wang S. N. et al (2007). Characterization of environmentally friendly nicotine degradation by Pseudomonas putida biotype A strain S16. Microbiology 153, 1556–1565
P. putida W619	2005		Poplar rhizosphere	One of the most commonly found species among the poplar endophytes	Wu, X., Monchy, S., Taghavi, S., Zhu, W., Ramos, J., & van der Lelie, D. (2010). Comparative genomics and functional analysis of niche-specific adaptation in Pseudomonas putida. FEMS microbiology reviews, 35(2), 299-323.
P. spp MPC6	2017	Deception Island, Antarctica	Soil	PHA producer	This work
P. spp UW4	1995	Ontario, Canada	rhizosphere of common reeds growing on the campus of the University of Waterloo	plant growth-promoting bacterium	Duan, J., Jiang, W., Cheng, Z., Heikkila, J. J., & Glick, B. R. (2013). The complete genome sequence of the plant growth-promoting bacterium Pseudomonas sp. UW4. PloS one, 8(3), e58640.
P. stutzeri A1501	1981	Rice paddy in China	Isolated from rice roots that had been inoculated with strain A15	studied for the nitrogen-fixation process	Qiu Y, Zhou S, Mo X, You C, Wang D (1981) Investigation of dinitrogen fixation bacteria isolated from rice rhizosphere. Chinese Sc Bull (Kexue Tongbao) 26:383–384. Yongliang Yan, Jian Yang, Yuetan Dou, Ming Chen, Shuzhen Ping, Junping Peng, Wei Lu, Wei Zhang, Ziying Yao, Hongquan Li, Wei Liu, Sheng He, Lizhao Geng, Xiaobing Zhang, Fan Yang, Haiying Yu, Yuhua Zhan, Danhua Li, Zhanglin Lin, Yiping …
P. syringae B728a	1987	USA: Wisconsin	Phaseolus vulgaris	Plant pathogen	Loper, J. E., and S. E. Lindow. (1987). Lack of evidence for in situ fluorescent pigment production by Pseudomonas syringae pv. syringae on bean leaf surfaces. Phytopathology 77:1449-1454. Feil, H., Feil, W. S., Chain, P., Larimer, F., DiBartolo, G., Copeland, A., Lykidis, A., Trong, S., Nolan, M., Goltsman, E., Thiel, J., Malfatti, S., Loper, J. E., Lapidus, A., Detter, J. C., Land, M., Richards…
P. syringae CC1557	2008	France	Snow	Highly virulent strain	Morris, C. E., Sands, D. C., Vinatzer, B. A., Glaux, C., Guilbaud, C., Buffière, A., Yan, S., Dominguez, H., and Thompson, B. M. (2008). The life history of the plant pathogen Pseudomonas syringae is linked to the water cycle. ISME J. 2:321-334.
P. syringae DC3000 (DC52)	1960 (DC52) 1986 (DC3000)	Guernsey, Channel Islands, United Kingdom	Tomato plant	Pathovar tomato (Pst) strain. Rifampicin-resistant form of the strain DC52	DIANE A. CUPPELS (1986). Generation and Characterization of Tn5 Insertion Mutations in Pseudomonas syringae pv. Tomato. APPLIED AND ENVIRONMENTAL MICROBIOLOGY, p. 323-327 Xiu-FangXin and ShengYangHe (2013) Pseudomonas syringae pv. tomato DC3000: A Model Pathogen for Probing Disease Susceptibility and Hormone Signalingin Plants. Annu.Rev.Phytopathol.51:473–98
P. syringae ICMP 9853	1984	Japan	Isolate obtained from Actinidia delicio	Bacterial canker of kiwifruit; also known as Kiwifruit vine disease	Yuichi TAKIKAWA, Setsuo SERIZAWA, Takeshi ICHIKAWA, Shinji TSUYUMU and Masao GOTO (1989). Pseudomonas syringae pv. actinidiae pv. nov.: The Causal Bacterium of Canker of Kiwifruit in Japan. Ann. Phytopath. Soc. Japan 55: 437-444
P. syringae UMAF0158	1993	Spain, Málaga	Mango tree, Mangifera indica	Mango Tree Pathogen	Cazorla FM, Torés JA, Olalla L, Pérez-García A, Farré JM, de Vicente A. Bacterial apical necrosis in mango in southern Spain: a disease produced by Pseudomonas syringapv. syringa. Phytopathology. 1998;88:614–620. doi: 10.1094/PHYTO.1998.88.7.614.
Pseudomonas fluorescens Pf0-1	1987	USA	agricultural soil	biocontrol of pathogens in agriculture.	Compeau, G., Al-Achi, B.J., Platsouka, E., and Levy, S.B. (1988) Survival of rifampicin-resistant mutants of Pseudomonas fluorescens and Pseudomonas putida in soil systems. Appl. Environ. Microbiol. 54: 2432-2438 DeFlaun, M.F., Tanzer, A.S., McAteer, A.L., Marshall, B., and Levy, S.B. (1990) Development and characterization of an adhesion-deficient mutant of Pseudomonas fluorescens. Appl. Environ…
Pseudomonas frederiksbergensis ERDD5:01	2014	Sikkim Himalaya	East Rathong glacier	psychrotrophic	Kumar R, Acharya V, Mukhia S, Singh D, Kumar S. (2018). Complete genome sequence of Pseudomonas frederiksbergensis ERDD5:01 revealed genetic bases for survivability at high altitude ecosystem and bioprospection potential. Genomics. 2018 Mar 9. pii: S0888-7543(18)30152-6. doi: 10.1016/j.ygeno.2018.03.008.
